# Supplementary material
Source: Springer Nature journal article supplement (https://www.springermedizin.de/resource/supplementary/12913_2011_1917_MOESM1_ESM.pdf/9529544)

Most preferred treatment

Recommended treatment

Least preferred treatment

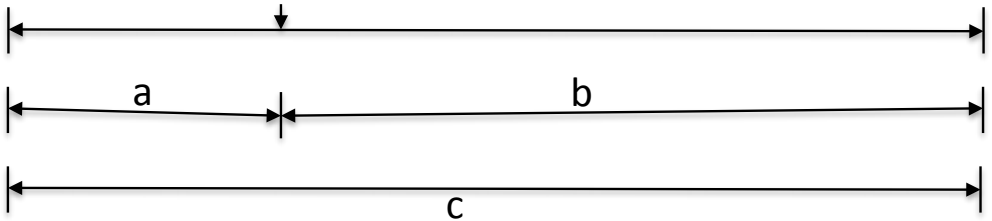

Supplement: MOESM1 [file 9529544]
